# Supplementary material for: Anti-Neuroinflammatory and Neuroprotective Effect of Intermedin B Isolated from the Curcuma longa L. via NF-κB and ROS Inhibition in BV2 Microglia and HT22 Hippocampal Cells
Source: MDPI journal article supplement (doi:10.3390/ijms24087390), 2023-04-17
Supplement: s1 [file s1]

# Anti-Neuroinflammatory and Neuroprotective Effect of Inter-medin B Isolated from the *Curcuma longa* L. via NF- $\kappa$ B and ROS Inhibition in BV2 microglia and HT22 hippocampus

Hwan Lee <sup>1</sup>, Zhiming Liu <sup>1</sup>, Linsha Dong <sup>1</sup>, Dae Young Lee <sup>2</sup>, Dahye Yoon <sup>2</sup>, Hyuncheol Oh <sup>3</sup>, Youn-Chul Kim <sup>3</sup>, Ren-Bo An <sup>4,\*</sup> and Dong-Sung Lee <sup>1,\*</sup>

<sup>1</sup> College of Pharmacy, Chosun University, Gwangju 61452, Republic of Korea; ghksldi123@hanmail.net (H.L.); lzmqust@126.com (Z.L.); donglinsha011@163.com (L.D.)

<sup>2</sup> Department of Herbal Crop Research, National Institute of Horticultural and Herbal Science, Rural Development Administration (RDA), Eumseong 27709, Republic of Korea; dylee0809@gmail.com (D.Y.L.); dahyeyoon@korea.kr (D.Y.)

<sup>3</sup> College of Pharmacy, Wonkwang University, Iksan 54538, Republic of Korea; hoh@wonkwang.ac.kr (H.O.); yckim@wku.ac.kr (Y.-C.K.)

<sup>4</sup> College of Pharmacy, Yanbian University, Yanji 133002, China

\* Correspondence: anrb@ybu.edu.cn (R.-B.A.); dslee2771@chosun.ac.kr (D.-S.L.)

## Contents

- Figure S1.**  $^1\text{H}$ - and  $^{13}\text{C}$ - NMR spectrum of compound 1.
- Figure S2.**  $^1\text{H}$ - and  $^{13}\text{C}$ - NMR spectrum of compound 2.
- Figure S3.**  $^1\text{H}$ - and  $^{13}\text{C}$ - NMR spectrum of compound 3.
- Figure S4.**  $^1\text{H}$ - and  $^{13}\text{C}$ - NMR spectrum of compound 4.
- Figure S5.**  $^1\text{H}$ - and  $^{13}\text{C}$ - NMR spectrum of compound 5.
- Figure S6.**  $^1\text{H}$ - and  $^{13}\text{C}$ - NMR spectrum of compound 6.
- Figure S7.**  $^1\text{H}$ - and  $^{13}\text{C}$ - NMR spectrum of compound 7.
- Figure S8.**  $^1\text{H}$ - and  $^{13}\text{C}$ - NMR spectrum of compound 8.
- Figure S9.**  $^1\text{H}$ - and  $^{13}\text{C}$ - NMR spectrum of compound 9.
- Figure S10.**  $^1\text{H}$ - and  $^{13}\text{C}$ - NMR spectrum of compound 10.
- Figure S11.**  $^1\text{H}$ - and  $^{13}\text{C}$ - NMR spectrum of compound 11.
- Figure S12.**  $^1\text{H}$ - and  $^{13}\text{C}$ - NMR spectrum of compound 12.
- Figure S13.**  $^1\text{H}$ - and  $^{13}\text{C}$ - NMR spectrum of compound 13.
- Figure S14.**  $^1\text{H}$ - and  $^{13}\text{C}$ - NMR spectrum of compound 14.
- Figure S15.**  $^1\text{H}$ - and  $^{13}\text{C}$ - NMR spectrum of compound 15.
- Figure S16.**  $^1\text{H}$ - and  $^{13}\text{C}$ - NMR spectrum of compound 16.
- Figure S17.**  $^1\text{H}$ - and  $^{13}\text{C}$ - NMR spectrum of compound 17.

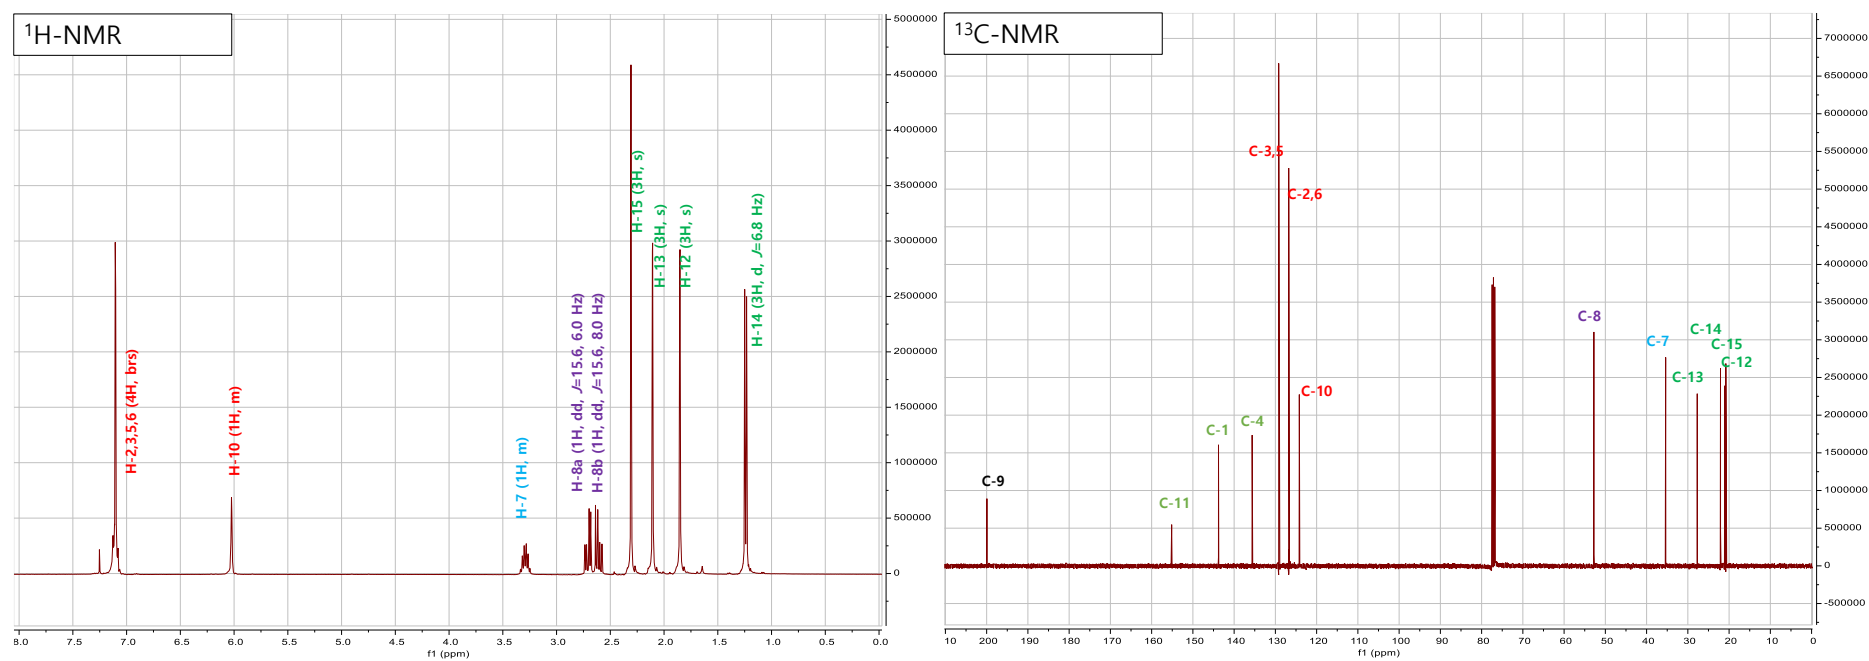

Figure S1.  $^1\text{H}$ - and  $^{13}\text{C}$ - NMR spectrum of compound 1.

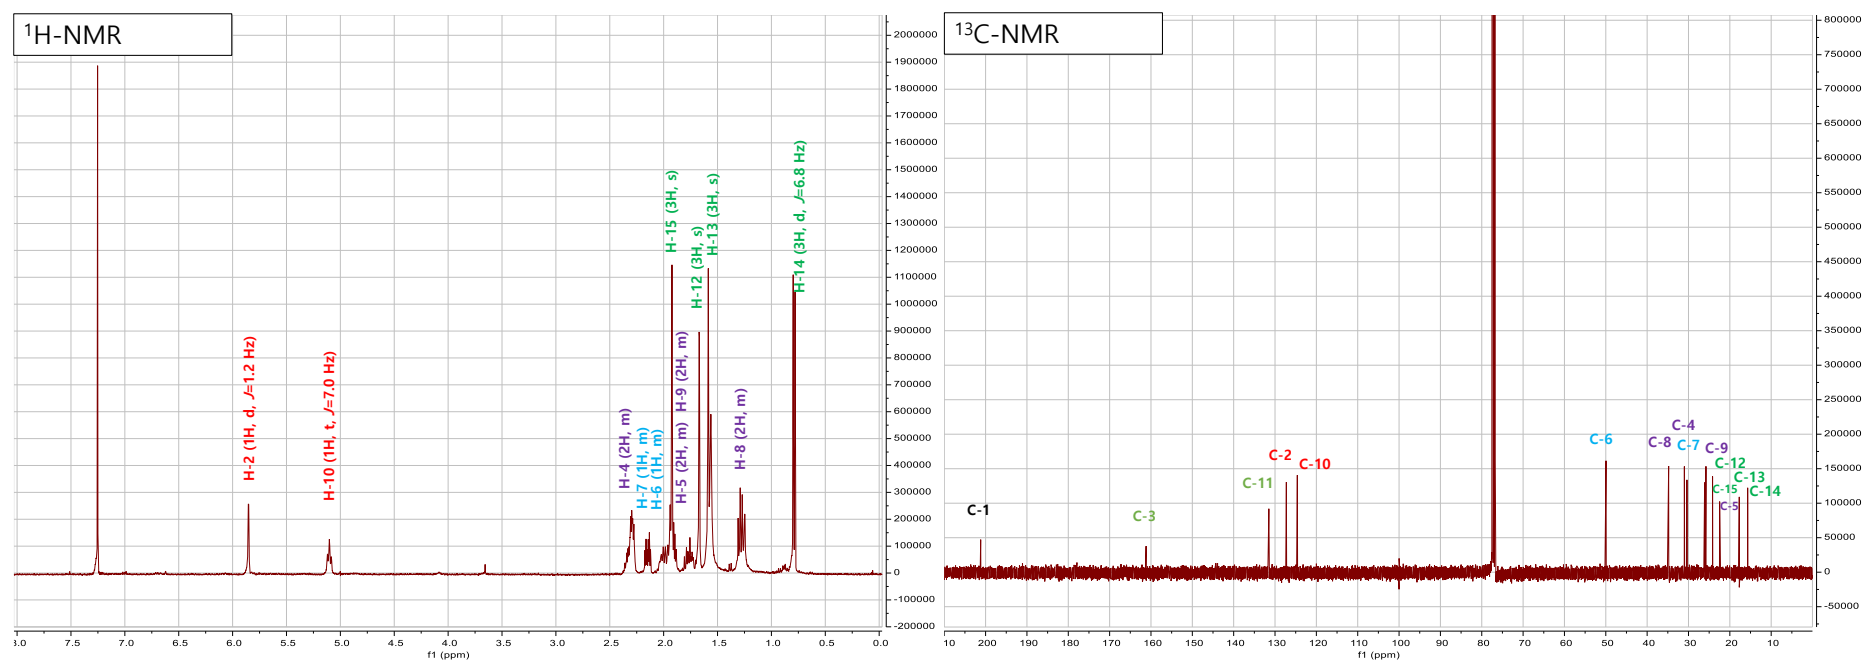

Figure S2.  $^1\text{H}$ - and  $^{13}\text{C}$ - NMR spectrum of compound 2.

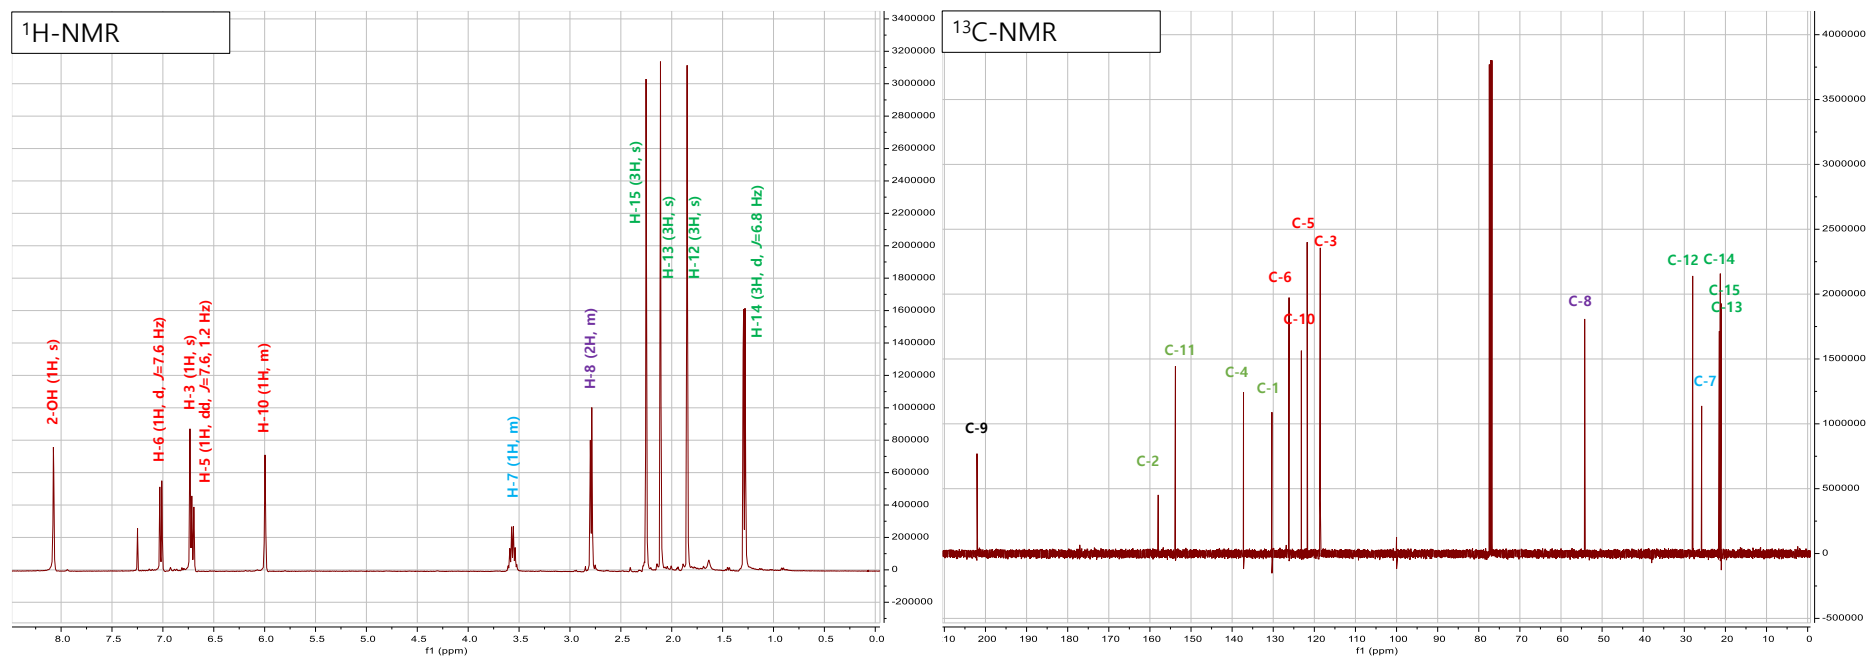

Figure S3. <sup>1</sup>H- and <sup>13</sup>C- NMR spectrum of compound 3.

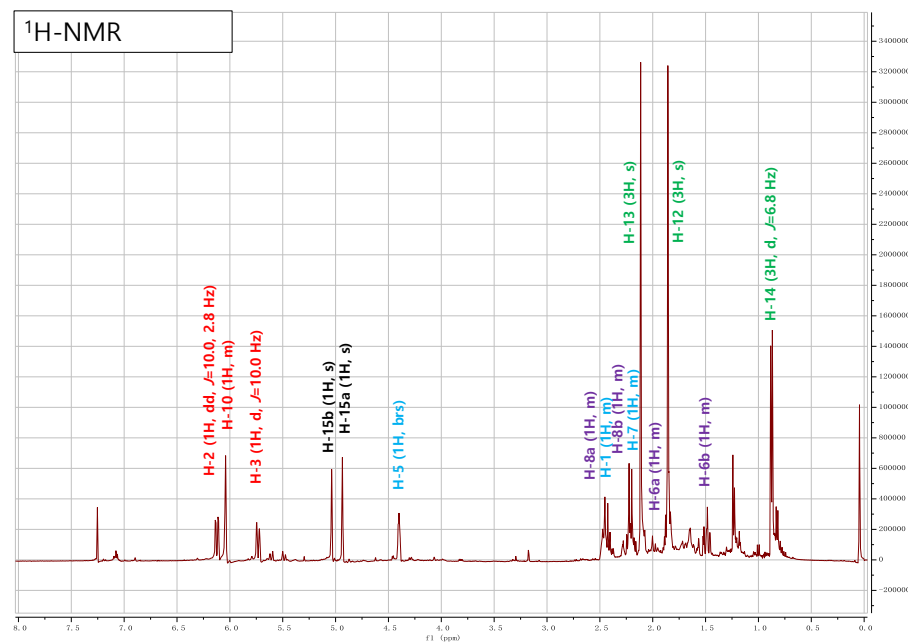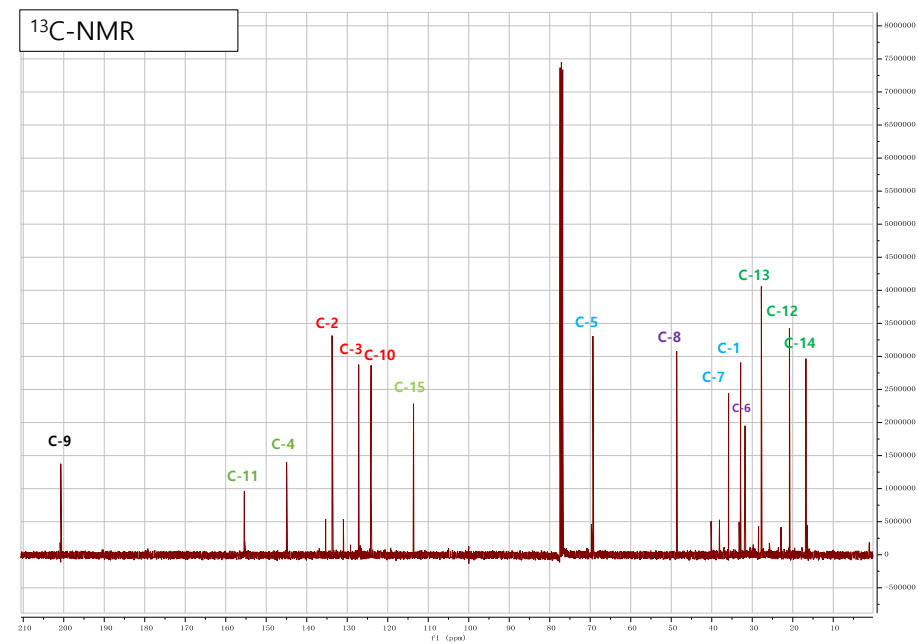

Figure S4. <sup>1</sup>H- and <sup>13</sup>C- NMR spectrum of compound 4.

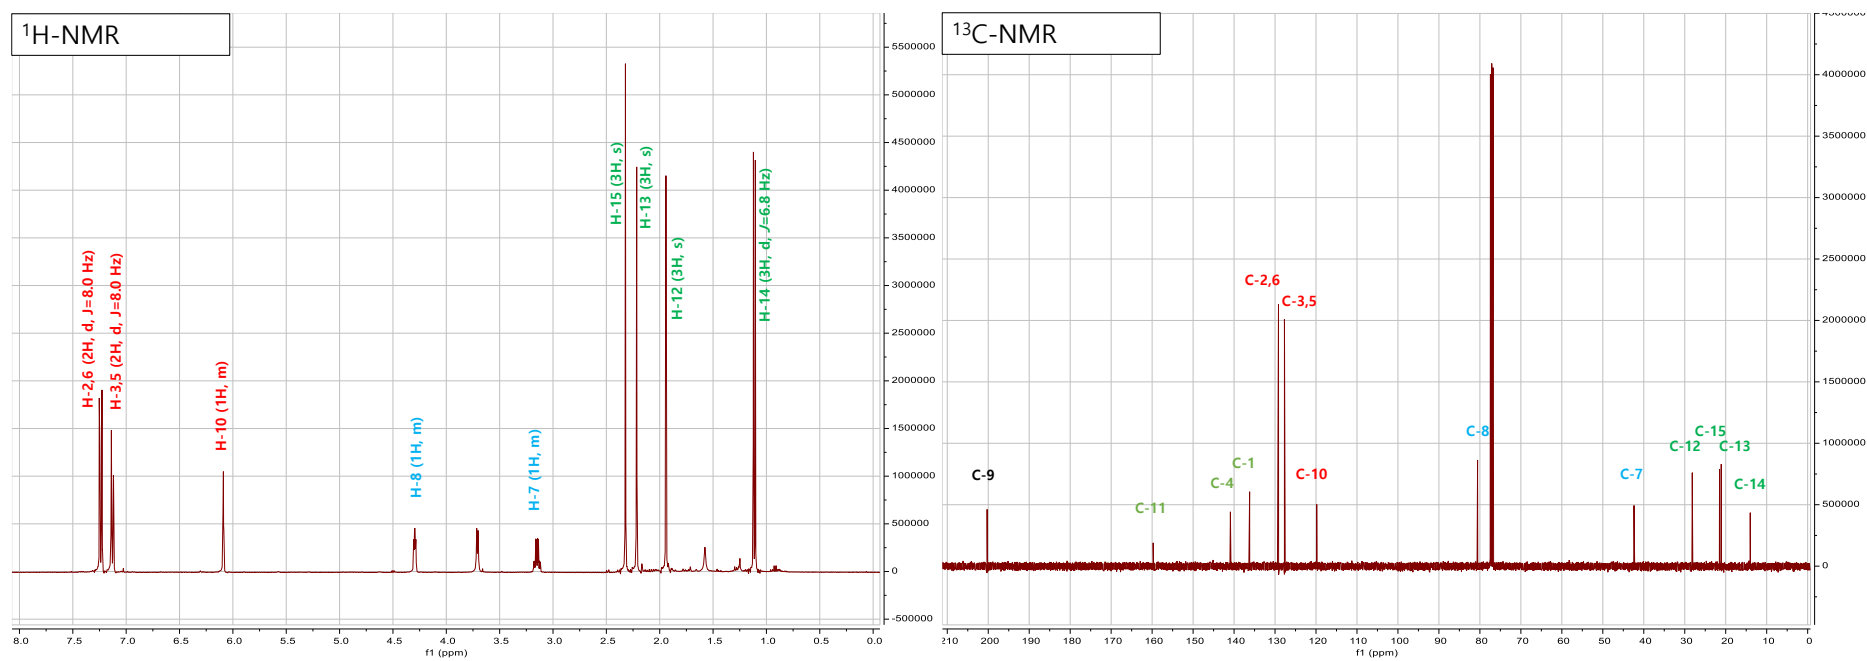

Figure S5.  $^1\text{H}$ - and  $^{13}\text{C}$ - NMR spectrum of compound 5.

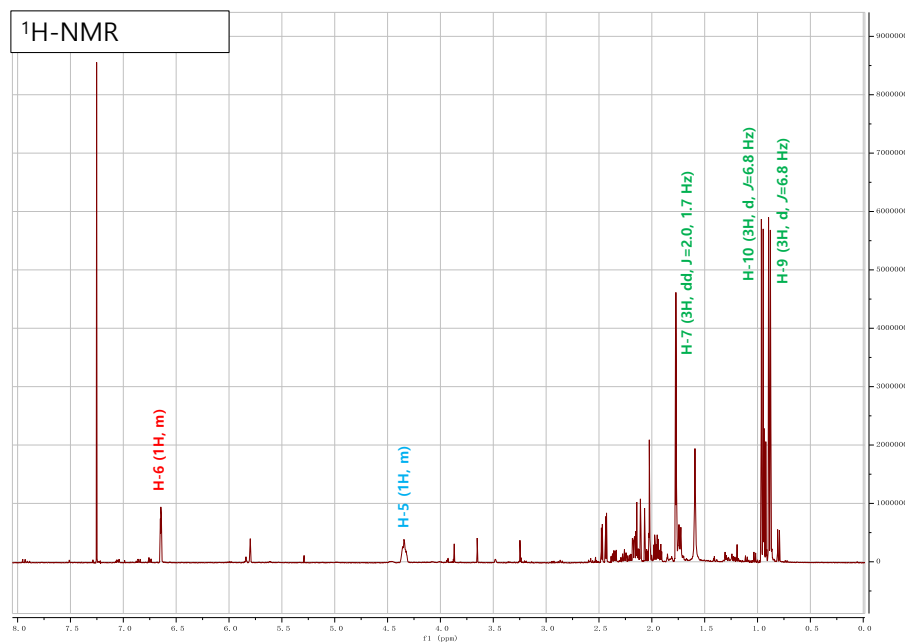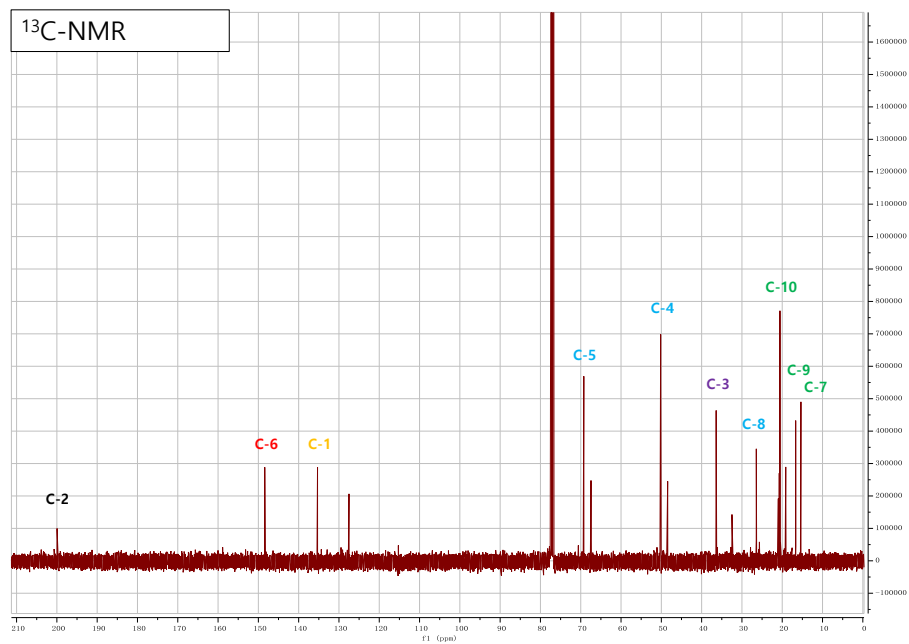

Figure S6. <sup>1</sup>H- and <sup>13</sup>C- NMR spectrum of compound 6.



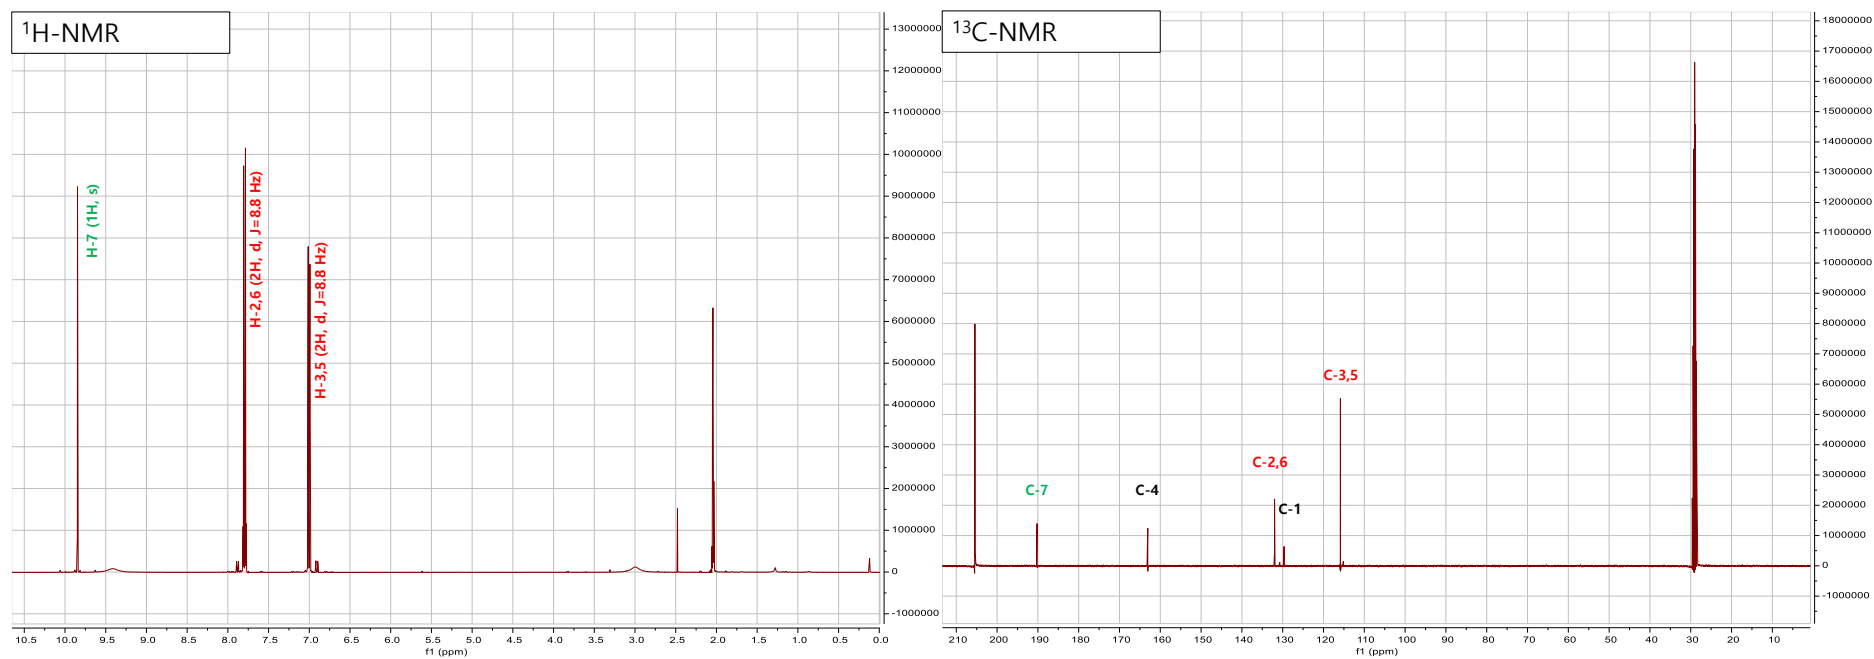

Figure S7.  $^1\text{H}$ - and  $^{13}\text{C}$ - NMR spectrum of compound 7.

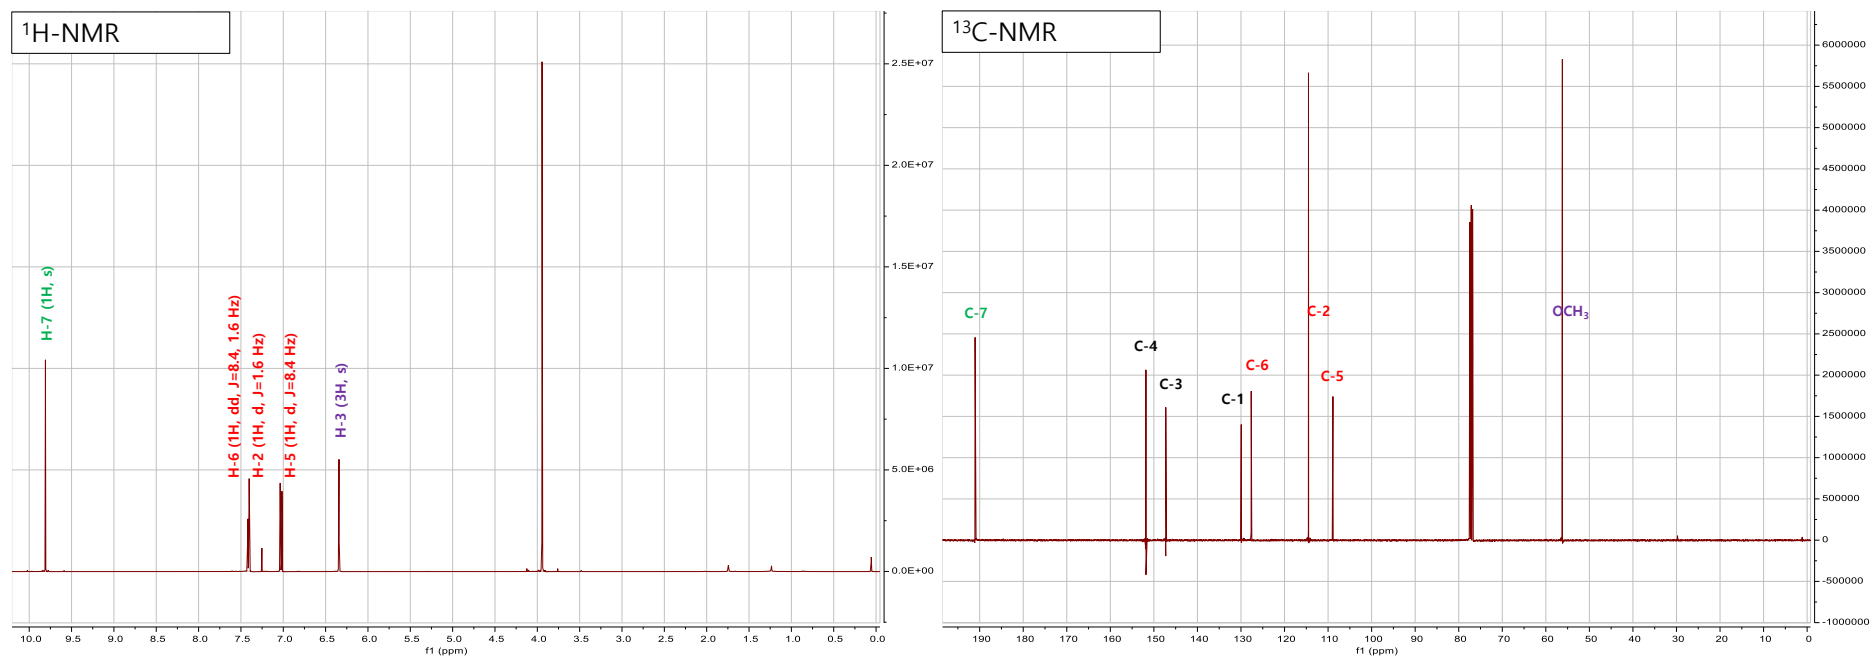

Figure S8.  $^1\text{H}$ - and  $^{13}\text{C}$ - NMR spectrum of compound 8.





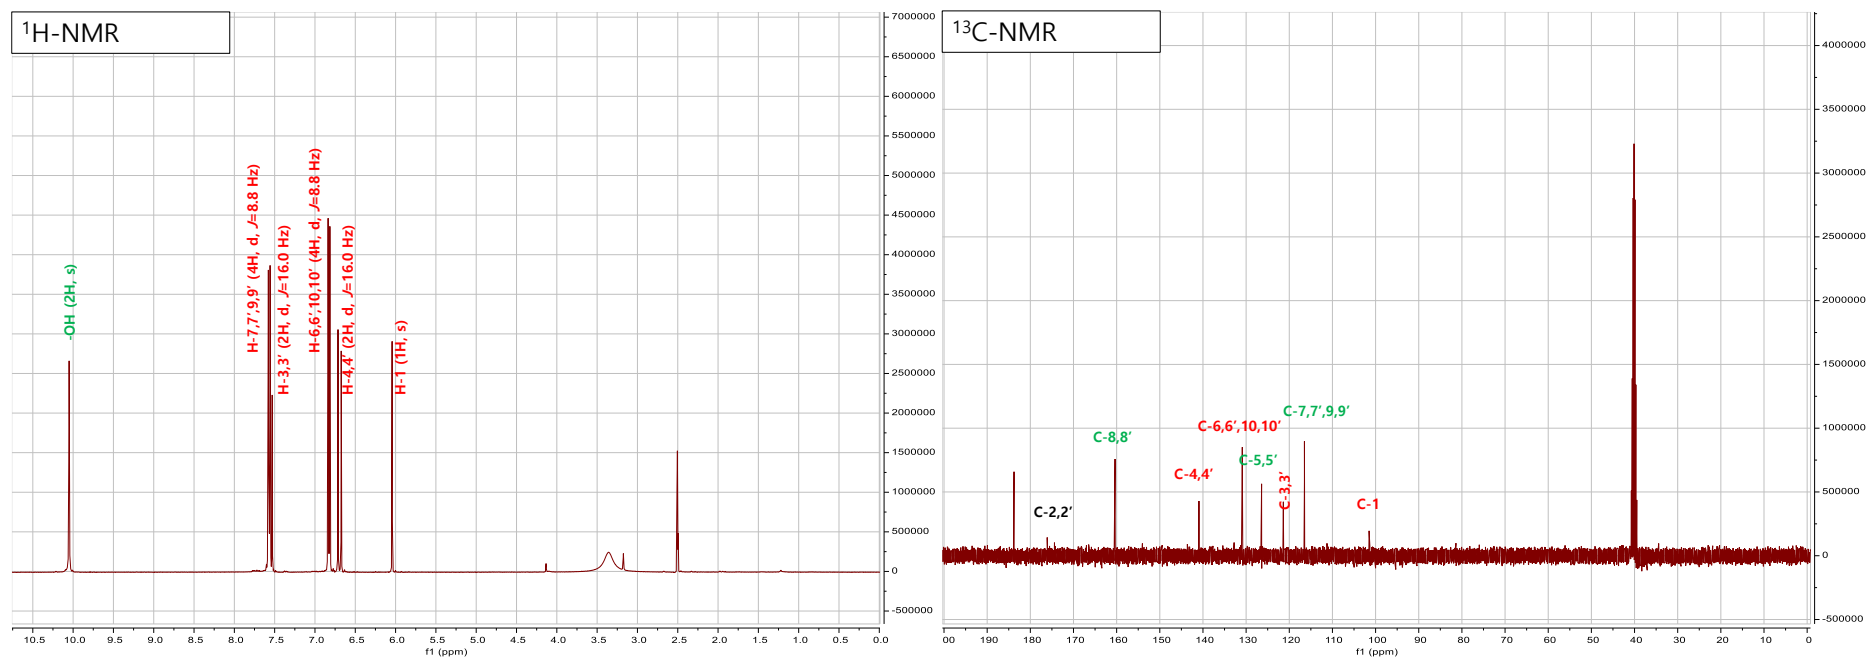

Figure S11.  $^1\text{H}$ - and  $^{13}\text{C}$ - NMR spectrum of compound 11.

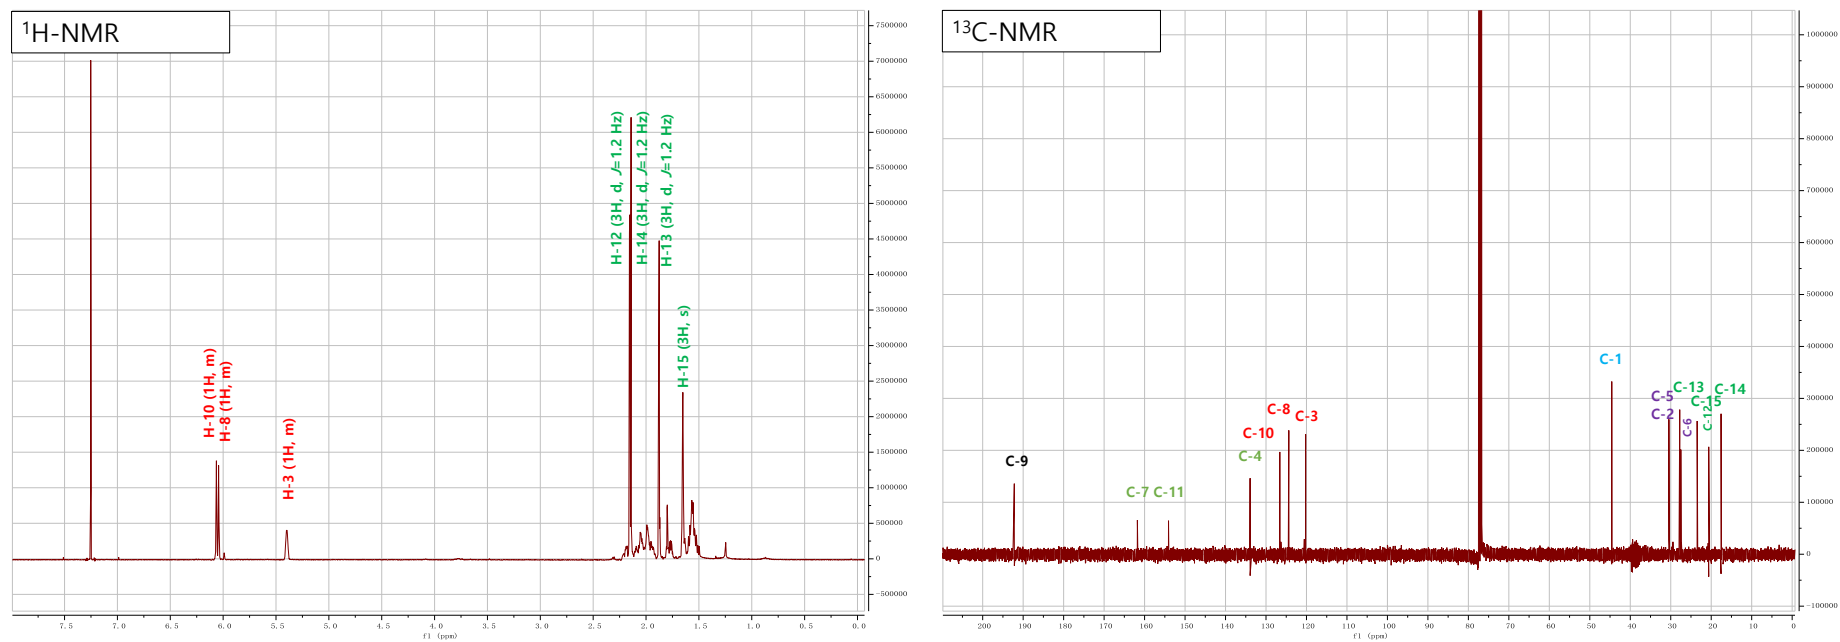

Figure S12.  $^1\text{H}$ - and  $^{13}\text{C}$ - NMR spectrum of compound 12.

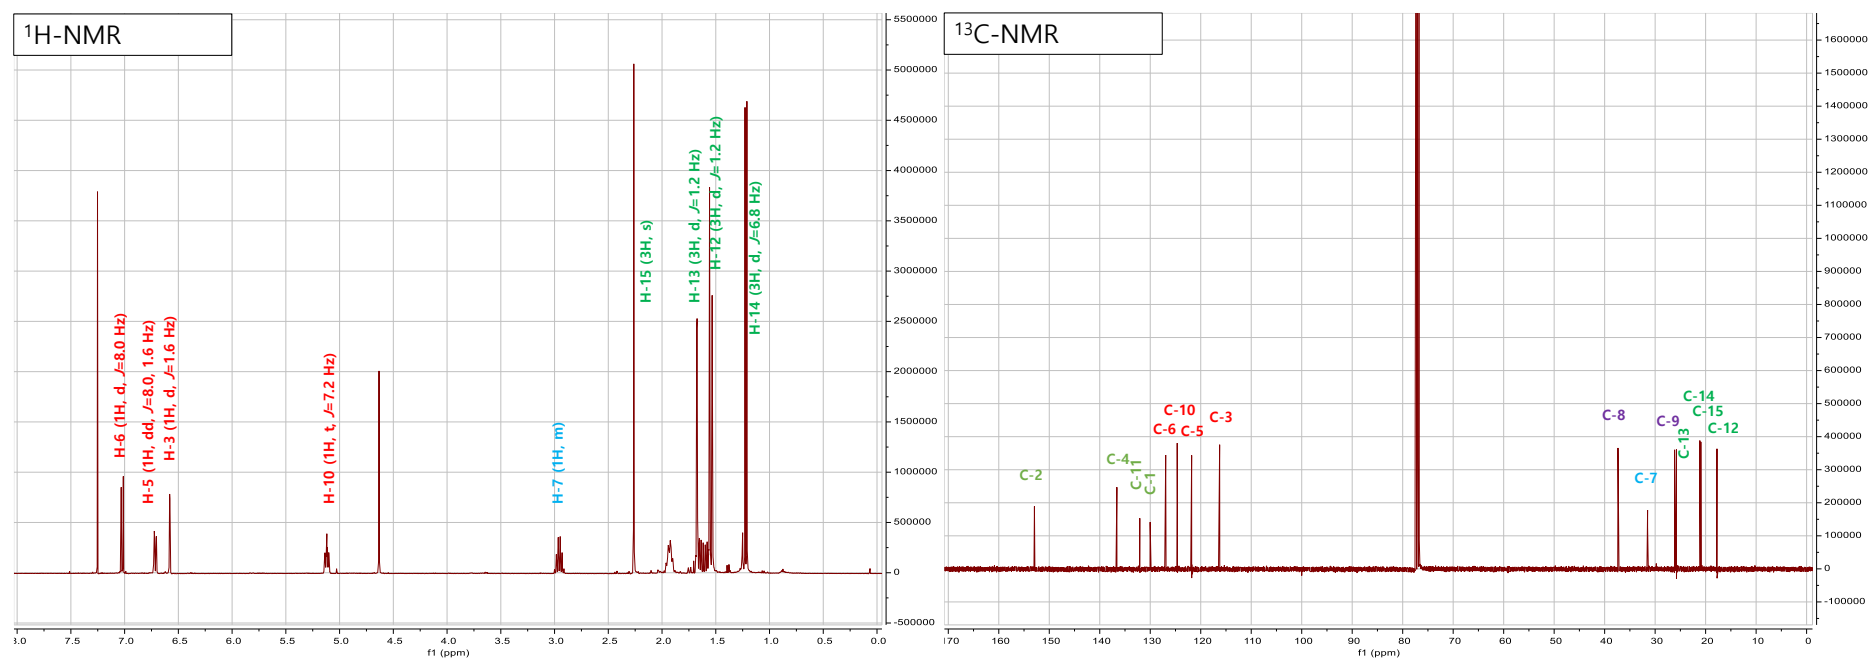

Figure S13.  $^1\text{H}$ - and  $^{13}\text{C}$ - NMR spectrum of compound 13.

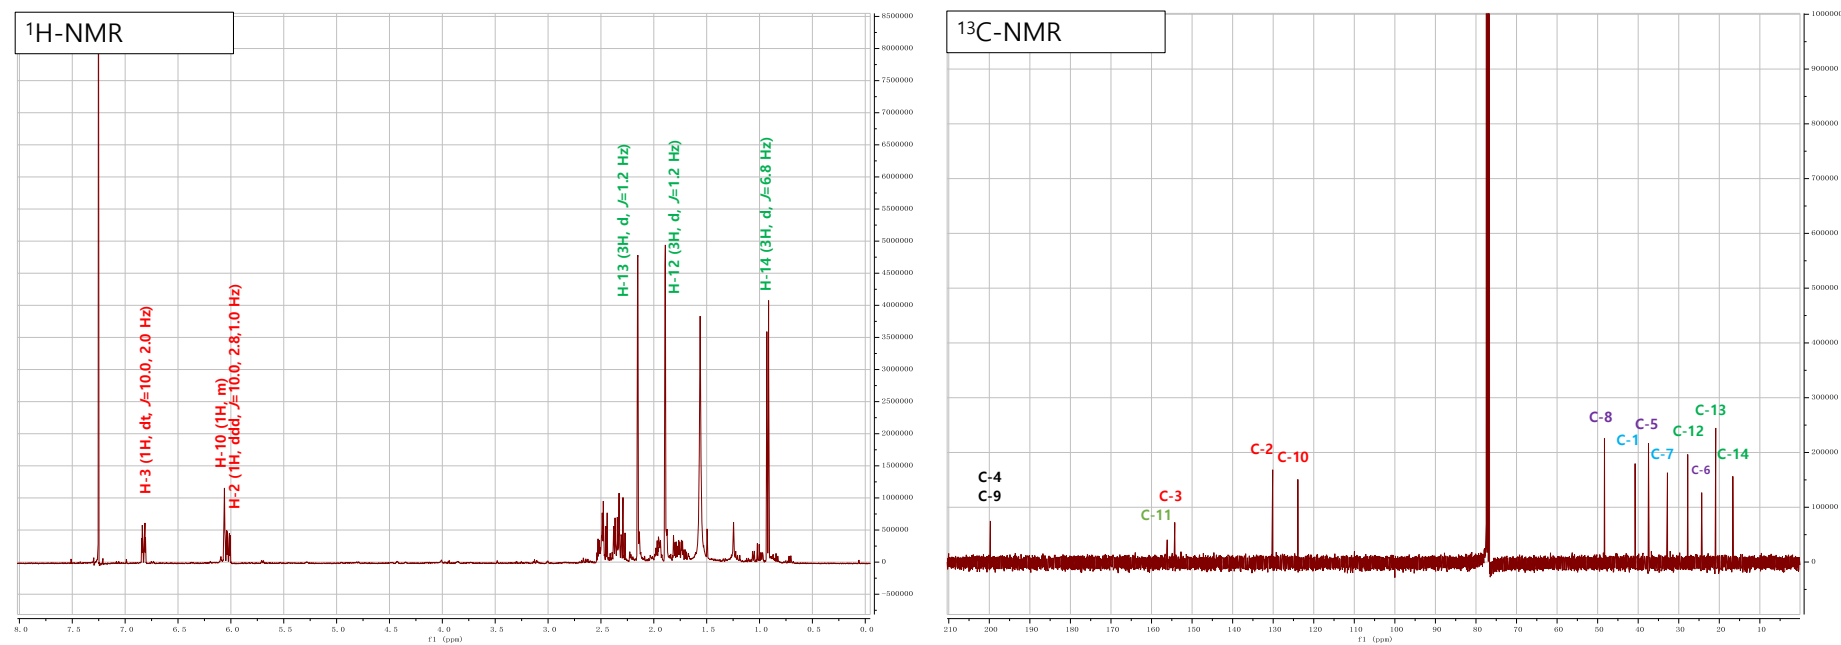

Figure S14.  $^1\text{H}$ - and  $^{13}\text{C}$ - NMR spectrum of compound 14.



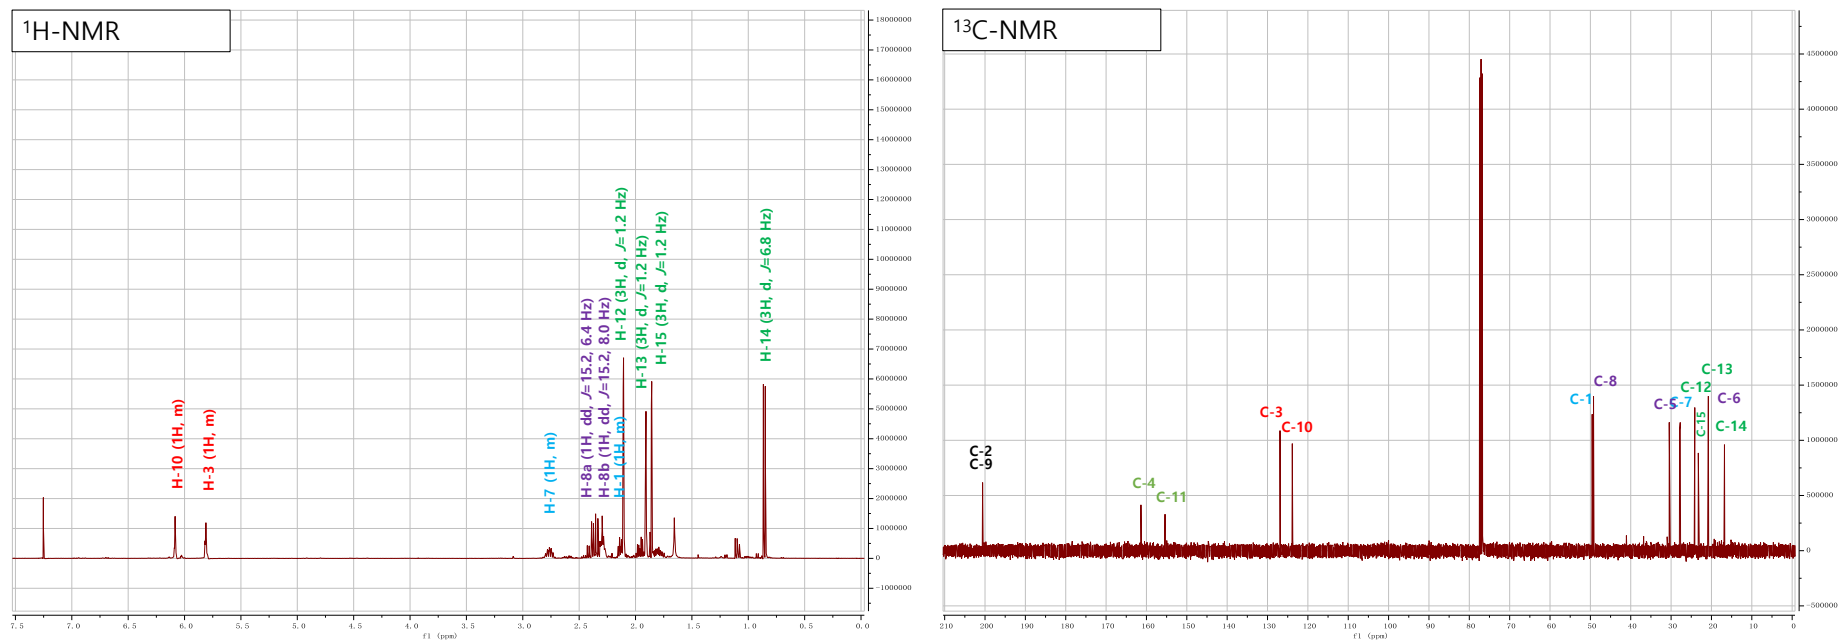

Figure S15.  $^1\text{H}$ - and  $^{13}\text{C}$ - NMR spectrum of compound 15.

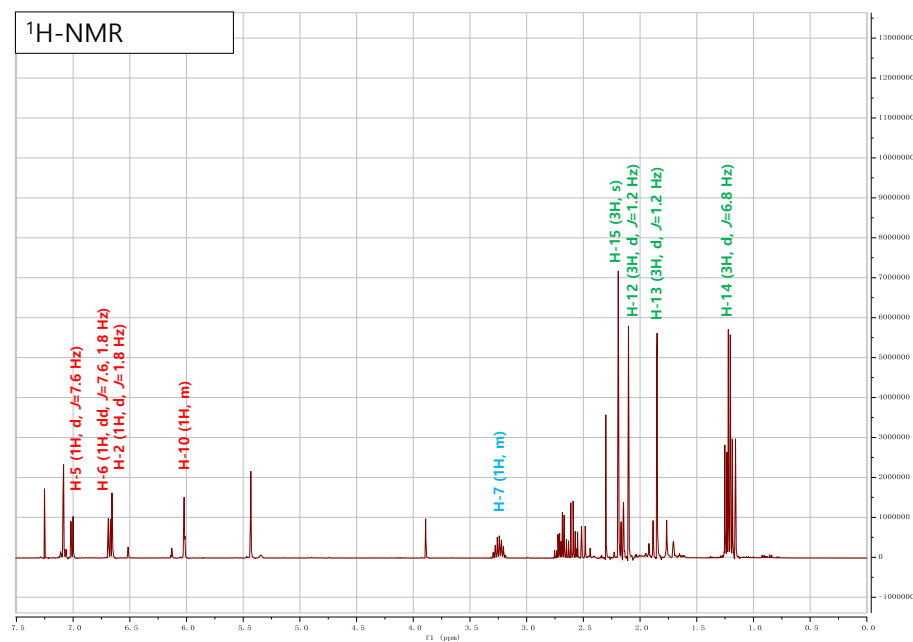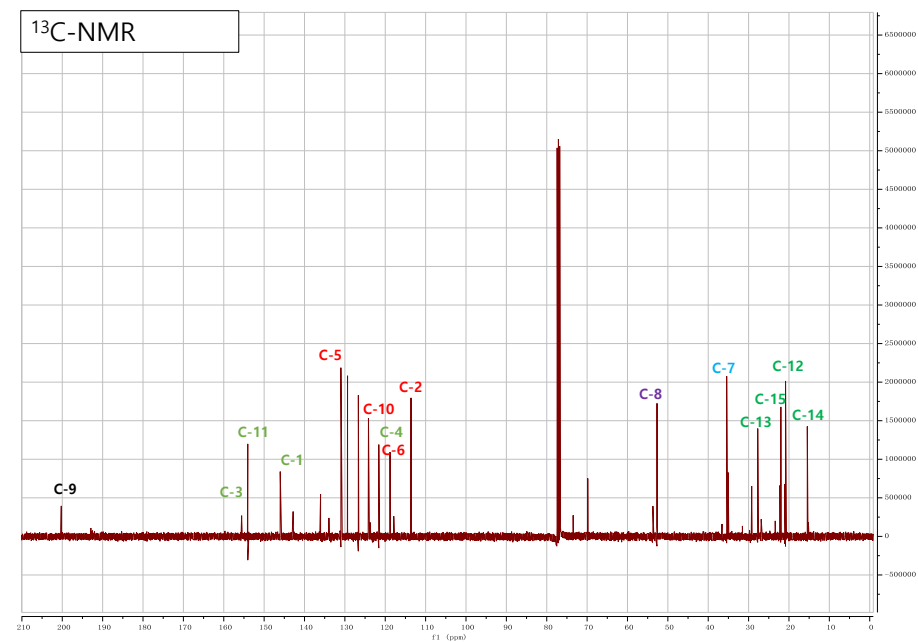

**Figure S16.** <sup>1</sup>H- and <sup>13</sup>C- NMR spectrum of compound **16**.

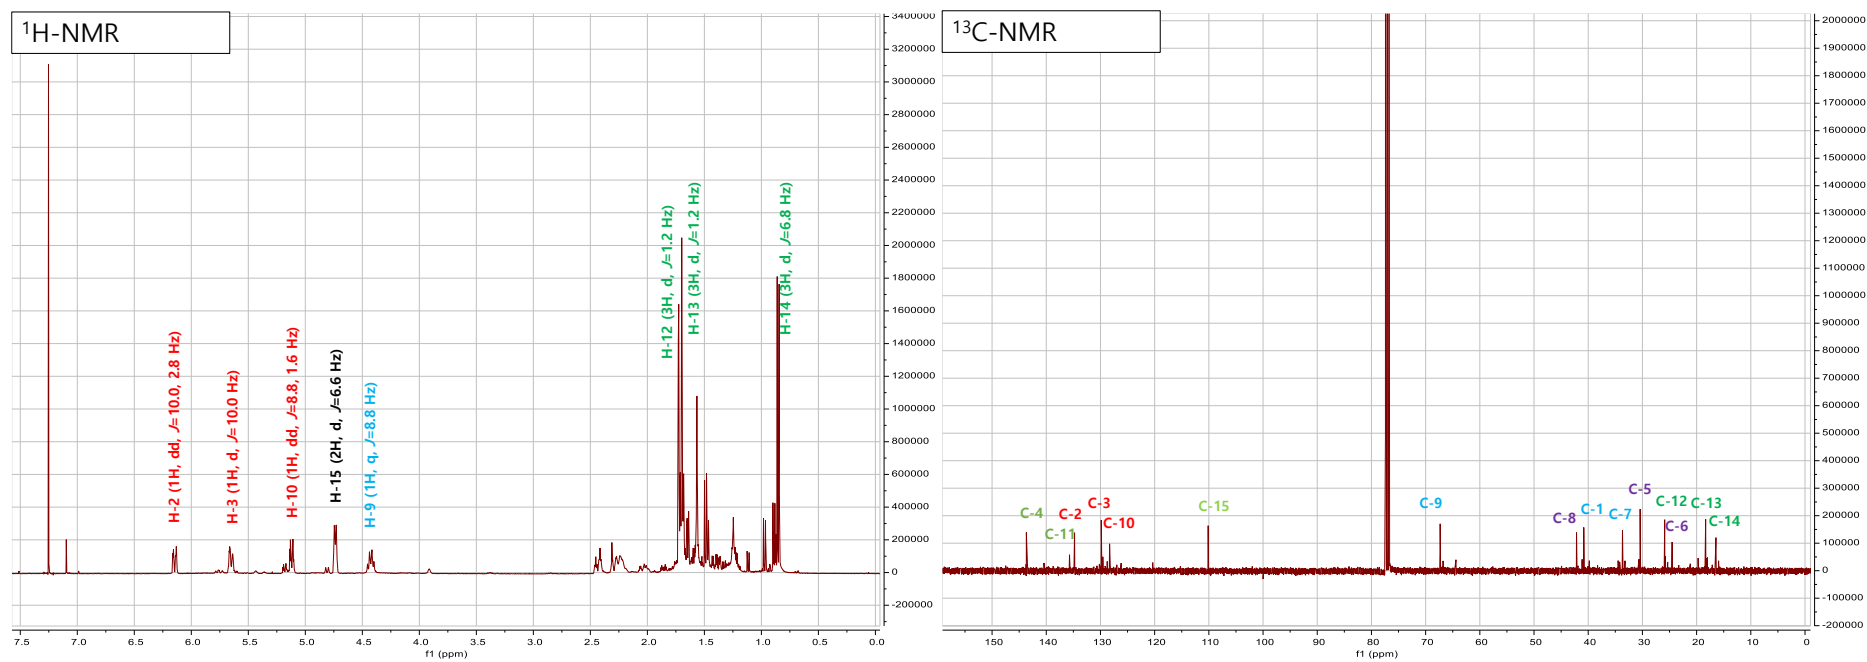

Figure S17. <sup>1</sup>H- and <sup>13</sup>C- NMR spectrum of compound 17.
